# Supplementary material
Source: PubMed Central journal article supplement (PMC5710420)
Supplement: jamasurg-152-1058-s001.pdf [file jamasurg-152-1058-s001.pdf]

## Supplementary Online Content

Varban OA, Cassidy RB, Bonham A, Carlin AM, Ghaferi A, Finks JF; Michigan Bariatric Surgery Collaborative. Factors associated with achieving a body mass index of less than 30 after bariatric surgery. *JAMA Surg*. Published online July 26, 2017. doi:10.1001/jamasurg.2017.2348

**eTable.** Comparison of Patient Demographics, Preoperative Comorbidities, and Procedure Type Between Patients Who Did and Did Not Provide a Follow-up Weight at 1 Year After Bariatric Surgery.

This supplementary material has been provided by the authors to give readers additional information about their work.

**eTable.** Comparison of Patient Demographics, Preoperative Comorbidities, and Procedure Type Between Patients Who Did and Did Not Provide a Follow-up Weight at 1 Year After Bariatric Surgery.

|                                               | 1-year Follow-up Weight Data Obtained |                    | Adjusted* Odds of obtaining a weight data 1 Year Post-Op |        |        |         |
|-----------------------------------------------|---------------------------------------|--------------------|----------------------------------------------------------|--------|--------|---------|
|                                               | No                                    | Yes                | Odds Ratio                                               | OR LCL | OR UCL | p-value |
| n                                             | 27,240                                | 27,320             |                                                          |        |        |         |
| <b>Demographics</b>                           |                                       |                    |                                                          |        |        |         |
| Age at Procedure (years): mean (+/- sd)       | 44.92 (+/- 11.72)                     | 47.25 (+/- 11.59)  | 1.024                                                    | 1.023  | 1.026  | <.0001  |
| Preop weight (Lbs): mean (+/- sd)             | 296.27 (+/- 63.59)                    | 293.94 (+/- 61.22) | 0.999                                                    | 0.999  | 0.999  | <.0001  |
| Male                                          | 23.17                                 | 20.86              | 0.875                                                    | 0.833  | 0.918  | <.0001  |
| Preop BMI (m/kg <sup>2</sup> ): mean (+/- sd) | 47.87 (+/- 8.54)                      | 47.77 (+/- 8.34)   | 0.995                                                    | 0.992  | 0.997  | <.0001  |
| Preop BMI <40 m/kg <sup>2</sup>               | 15.82                                 | 15.40              | 1.073                                                    | 1.014  | 1.135  | 0.0154  |
| Preop BMI Category                            |                                       |                    |                                                          |        |        |         |
| BMI <40 m/kg <sup>2</sup>                     | 15.82                                 | 15.40              | Ref                                                      |        |        |         |
| BMI 40-49 m/kg <sup>2</sup>                   | 49.78                                 | 50.62              | 0.967                                                    | 0.911  | 1.026  | 0.2641  |
| BMI 50-59 m/kg <sup>2</sup>                   | 25.58                                 | 25.81              | 0.903                                                    | 0.846  | 0.965  | 0.0024  |
| BMI ≥60 m/kg <sup>2</sup>                     | 8.81                                  | 8.17               | 0.833                                                    | 0.764  | 0.907  | <.0001  |
| Race                                          |                                       |                    |                                                          |        |        |         |
| White, not of Hispanic Origin                 | 40.28                                 | 79.81              | Ref                                                      |        |        |         |
| Black, not of Hispanic Origin                 | 10.21                                 | 11.41              | 0.567                                                    | 0.536  | 0.600  | <.0001  |
| Other or Unknown                              | 46.52                                 | 4.99               | 0.694                                                    | 0.629  | 0.766  | <.0001  |
| Hispanic                                      | 2.50                                  | 3.14               | 0.639                                                    | 0.576  | 0.710  | <.0001  |
| American Indian or Alaskan Native             | 0.36                                  | 0.54               | 0.755                                                    | 0.582  | 0.980  | 0.0347  |
| Asian or Pacific Islander                     | 0.14                                  | 0.12               | 0.476                                                    | 0.296  | 0.767  | 0.0023  |
| Income level                                  |                                       |                    |                                                          |        |        |         |
| Less than \$10,000 per year                   | 8.44                                  | 6.51               | 0.702                                                    | 0.647  | 0.763  | <.0001  |
| Between \$10,000 and \$24,999 per year        | 16.89                                 | 13.67              | 0.739                                                    | 0.693  | 0.788  | <.0001  |
| Between \$25,000 and \$44,999 per year        | 25.05                                 | 23.84              | 0.867                                                    | 0.820  | 0.917  | <.0001  |
| Between \$45,000 and \$75,000 per year        | 26.33                                 | 28.90              | Ref                                                      |        |        |         |
| More than \$75,000 per year                   | 23.30                                 | 27.08              | 1.060                                                    | 1.002  | 1.121  | 0.041   |
| Education                                     |                                       |                    |                                                          |        |        |         |
| Some college or technical school              | 48.94                                 | 46.57              | Ref                                                      |        |        |         |
| 8 grades or less                              | 0.54                                  | 0.38               | 0.664                                                    | 0.490  | 0.900  | 0.0082  |
| Some high school                              | 4.19                                  | 2.98               | 0.749                                                    | 0.671  | 0.837  | <.0001  |
| High school graduate or GED                   | 19.39                                 | 20.07              | 1.080                                                    | 1.023  | 1.140  | 0.0055  |
| College graduate (Bachelor's degree)          | 17.71                                 | 19.09              | 1.132                                                    | 1.071  | 1.196  | <.0001  |

|                                   |                                       |       |                                                          |        |        |         |
|-----------------------------------|---------------------------------------|-------|----------------------------------------------------------|--------|--------|---------|
| Graduate degree                   | 9.23                                  | 10.92 | 1.250                                                    | 1.165  | 1.341  | <.0001  |
| Private Insurance:                | 59.03                                 | 56.41 | 1.060                                                    | 1.018  | 1.104  | 0.0047  |
|                                   | 1-year Follow-up Weight Data Obtained |       | Adjusted* Odds of obtaining a weight data 1 Year Post-Op |        |        |         |
|                                   | No                                    | Yes   | Odds Ratio                                               | OR LCL | OR UCL | p-value |
| <b>Comorbidities</b>              |                                       |       |                                                          |        |        |         |
| Hypertension                      | 52.26                                 | 55.78 | 1.15                                                     | 1.11   | 1.19   | <.0001  |
| Non-insulin dependent diabetes    | 31.78                                 | 33.77 | 1.10                                                     | 1.06   | 1.13   | <.0001  |
| Insulin dependent diabetes        | 10.29                                 | 11.41 | 1.12                                                     | 1.06   | 1.19   | <.0001  |
| Hyperlipidemia                    | 48.60                                 | 52.35 | 1.16                                                     | 1.12   | 1.20   | <.0001  |
| Coronary artery disease           | 54.13                                 | 57.76 | 1.16                                                     | 1.12   | 1.20   | <.0001  |
| Obstructive sleep apnea           | 44.94                                 | 46.68 | 1.07                                                     | 1.04   | 1.11   | <.0001  |
| Mobility limitation               | 5.47                                  | 5.96  | 1.10                                                     | 1.02   | 1.18   | 0.0139  |
| Asthma                            | 20.56                                 | 21.06 | 1.03                                                     | 0.99   | 1.07   | 0.1505  |
| Psychological Disorder            | 48.78                                 | 50.65 | 1.08                                                     | 1.04   | 1.12   | <.0001  |
| History of venous thromboembolism | 3.92                                  | 4.24  | 1.09                                                     | 1.00   | 1.18   | 0.0607  |
| Urinary Incontinence              | 18.54                                 | 24.13 | 1.40                                                     | 1.34   | 1.46   | <.0001  |
| Arthritis                         | 75.63                                 | 75.58 | 1.00                                                     | 0.96   | 1.04   | 0.9010  |
| Kidney Disease                    | 0.30                                  | 0.23  | 0.77                                                     | 0.55   | 1.07   | 0.1132  |
| Liver Disease                     | 6.09                                  | 6.16  | 1.01                                                     | 0.94   | 1.08   | 0.7602  |
| GERD                              | 49.43                                 | 50.31 | 1.04                                                     | 1.00   | 1.07   | 0.0398  |
| <b>Procedure Type</b>             |                                       |       |                                                          |        |        |         |
| LAGB                              | 22.24                                 | 16.43 | Ref                                                      |        |        |         |
| SG                                | 33.66                                 | 38.36 | 0.855                                                    | 0.806  | 0.907  | <.0001  |
| RYGB                              | 43.16                                 | 44.13 | 1.111                                                    | 1.048  | 1.179  | 0.0005  |
| BPD/DS                            | 0.94                                  | 1.08  | 1.278                                                    | 1.029  | 1.586  | 0.0262  |

(LCL – lower control limit , UCL – upper control limit, sd – standard deviation, preop – preoperative, BMI – body mass index, GED – General Education Development, GERD – gastroesophageal reflux disease, LAGB – laparoscopic adjustable gastric banding, SG – sleeve gastrectomy, RYGB – Roux-en-Y gastric bypass, BPD/DS – biliopancreatic diversion with duodenal switch. )
